# Supplementary material for: First Insight into the Kinome of Human Regulatory T Cells
Source: PubMed Central journal article supplement (PMC3397934; doi:10.1371/journal.pone.0040896), 2012-07-16
Supplement: pone.0040896.s003.pdf [file pone.0040896.s003.pdf]

**Table S1 – The kinase complement of human Tregs and Teffs.**

| Name <sup>1</sup><br>[UniProt] | Kinase<br>family <sup>2</sup> | Mascot score <sup>3</sup><br>[median] | Frequency of<br>identification <sup>4</sup> | Frequency of<br>regulation <sup>5</sup> | Differential expression <sup>6</sup><br>[RF <sub>median</sub> =Treg/Teff] |
|--------------------------------|-------------------------------|---------------------------------------|---------------------------------------------|-----------------------------------------|---------------------------------------------------------------------------|
| AAK1                           | Other                         | 707                                   | 4                                           | 0                                       | 1,1                                                                       |
| AAKB1                          | CAMK                          | 162                                   | 1                                           | 0                                       | -1,0                                                                      |
| AAKB2                          | CAMK                          | 236                                   | 1                                           | -                                       | -1,6                                                                      |
| AAKG1                          | CAMK                          | 396                                   | 1                                           | 0                                       | -1,3                                                                      |
| AAKG2                          | CAMK                          | 80                                    | 1                                           | 0                                       | -1,2                                                                      |
| AAPK1                          | CAMK                          | 1960                                  | 1                                           | 0                                       | -1,2                                                                      |
| ABL1                           | TK                            | 96                                    | 1                                           | 0                                       | -1,2                                                                      |
| ABL2                           | TK                            | 662                                   | 1                                           | +                                       | 1,5                                                                       |
| ACK1                           | TK                            | 183                                   | 1                                           | 0                                       | 1,5                                                                       |
| ACVR1                          | TKL                           | 204                                   | 2                                           | +                                       | 1,6                                                                       |
| ALPK1                          | Atypical                      | 32                                    | 1                                           | 0                                       | 1,2                                                                       |
| ATM                            | Atypical                      | 114                                   | 1                                           | +                                       | 2,0                                                                       |
| ATR                            | Atypical                      | 21                                    | 1                                           | 0                                       | -1,2                                                                      |
| AURKB                          | Other                         | 55                                    | 3                                           | --                                      | -3,6                                                                      |
| BMP2K                          | Other                         | 1162                                  | 2                                           | +                                       | 1,3                                                                       |
| BMPR2                          | TKL                           | 368                                   | 1                                           | 0                                       | 1,5                                                                       |
| CD2L6                          | CMGC                          | 108                                   | 1                                           | 0                                       | 1,0                                                                       |
| CD2L7                          | CMGC                          | 162                                   | 1                                           | 0                                       | 1,1                                                                       |
| CDK1                           | CMGC                          | 560                                   | 2                                           | --                                      | -3,6                                                                      |
| CDK10                          | CMGC                          | 118                                   | 1                                           | 0                                       | 1,1                                                                       |
| CDK2                           | CMGC                          | 339                                   | 4                                           | --                                      | -1,6                                                                      |
| CDK3                           | CMGC                          | 47                                    | 3                                           | +++                                     | 2,0                                                                       |
| CDK4                           | CMGC                          | 72                                    | 3                                           | 0                                       | 1,2                                                                       |
| CDK5                           | CMGC                          | 421                                   | 4                                           | ++                                      | 1,4                                                                       |
| CDK6                           | CMGC                          | 474                                   | 4                                           | ----                                    | -3,2                                                                      |
| CDK7                           | CMGC                          | 1313                                  | 1                                           | 0                                       | 1,1                                                                       |
| CDK9                           | CMGC                          | 554                                   | 4                                           | 0                                       | 1,2                                                                       |
| CDKL5                          | CMGC                          | 30                                    | 1                                           | 0                                       | 1,4                                                                       |
| CHKA                           | NPK                           | 68                                    | 1                                           | +                                       | 1,7                                                                       |
| CHKB                           | NPK                           | 148                                   | 1                                           | +                                       | 1,6                                                                       |
| CLK1                           | CMGC                          | 292                                   | 1                                           | 0                                       | 1,1                                                                       |
| CLK2                           | CMGC                          | 435                                   | 1                                           | -                                       | -1,6                                                                      |
| CLK3                           | CMGC                          | 179                                   | 1                                           | 0                                       | -1,0                                                                      |
| CLK4                           | CMGC                          | 150                                   | 1                                           | +                                       | 1,5                                                                       |
| CSK                            | TK                            | 1846                                  | 2                                           | +                                       | 1,6                                                                       |
| CSK21                          | Other                         | 578                                   | 4                                           | +                                       | 1,3                                                                       |
| CSK22                          | Other                         | 664                                   | 4                                           | 0                                       | 1,2                                                                       |
| CSK2B                          | Other                         | 692                                   | 4                                           | 0                                       | 1,3                                                                       |
| DAPK1                          | CAMK                          | 35                                    | 1                                           | 0                                       | 1,5                                                                       |
| DCLK3                          | CAMK                          | 23                                    | 1                                           | 0                                       | 1,2                                                                       |
| DGKA                           | NPK                           | 21                                    | 1                                           | +                                       | 2,2                                                                       |
| DYR1A                          | CMGC                          | 230                                   | 1                                           | 0                                       | -1,1                                                                      |
| DYR1B                          | CMGC                          | 31                                    | 1                                           | +                                       | 1,8                                                                       |
| EF2K                           | Atypical                      | 21                                    | 1                                           | 0                                       | 1,4                                                                       |
| EPHA2                          | TK                            | 105                                   | 1                                           | 0                                       | 1,1                                                                       |
| EPHA4                          | TK                            | 628                                   | 1                                           | +                                       | 7,4                                                                       |
| EPHB1                          | TK                            | 79                                    | 2                                           | ++                                      | 6,9                                                                       |

|       |          |      |   |      |      |
|-------|----------|------|---|------|------|
| EPHB4 | TK       | 22   | 1 | 0    | -1,2 |
| ERN1  | Other    | 1346 | 1 | 0    | -1,4 |
| FAK1  | TK       | 130  | 1 | 0    | 1,3  |
| FAK2  | TK       | 1126 | 4 | 0    | 1,0  |
| FER   | TK       | 243  | 1 | +    | 1,6  |
| FES   | TK       | 2804 | 1 | -    | -6,2 |
| FGR   | TK       | 195  | 1 | 0    | 1,2  |
| FRAP  | Atypical | 95   | 1 | 0    | 1,2  |
| FRK   | TK       | 66   | 2 | +    | 1,7  |
| FYN   | TK       | 1212 | 1 | +    | 2,1  |
| GAK   | Other    | 113  | 3 | 0    | -1,0 |
| GRK6  | AGC      | 31   | 1 | +    | 2,0  |
| GSK3A | CMGC     | 429  | 3 | 0    | -1,2 |
| GSK3B | CMGC     | 467  | 4 | 0    | 1,2  |
| HIPK1 | CMGC     | 69   | 3 | 0    | -1,0 |
| HUNK  | CAMK     | 24   | 1 | 0    | 1,4  |
| IGF1R | TK       | 101  | 1 | 0    | 1,1  |
| IKKA  | Other    | 166  | 1 | -    | -2,0 |
| IKKB  | Other    | 1859 | 1 | -    | -2,2 |
| IKKE  | Other    | 1596 | 2 | 0    | 1,2  |
| ILK   | TKL      | 368  | 1 | 0    | 1,3  |
| IRAK3 | TKL      | 265  | 1 | 0    | 1,2  |
| IRAK4 | TKL      | 32   | 1 | 0    | -1,2 |
| ITK   | TK       | 79   | 4 | +    | 1,3  |
| JAK1  | TK       | 2549 | 1 | 0    | 1,4  |
| JAK3  | TK       | 609  | 2 | -    | -1,4 |
| KC1A  | CK1      | 867  | 2 | 0    | -1,1 |
| KC1D  | CK1      | 325  | 4 | +    | 1,1  |
| KC1E  | CK1      | 566  | 2 | 0    | -1,1 |
| KC1G1 | CK1      | 380  | 1 | 0    | 1,1  |
| KC1G2 | CK1      | 32   | 1 | 0    | -1,0 |
| KC1G3 | CK1      | 272  | 1 | 0    | 1,0  |
| KCC2B | CAMK     | 21   | 1 | 0    | 1,5  |
| KCC2D | CAMK     | 885  | 4 | ++++ | 1,7  |
| KCC2G | CAMK     | 364  | 3 | +    | 1,2  |
| KCC4  | CAMK     | 43   | 1 | -    | -2,0 |
| KCY   | NPK      | 29   | 1 | 0    | 1,3  |
| KPB1  | NPK      | 48   | 1 | 0    | 1,1  |
| KPB2  | NPK      | 103  | 1 | 0    | 1,1  |
| KPBB  | NPK      | 176  | 1 | 0    | -1,5 |
| KPCA  | AGC      | 317  | 1 | -    | -1,6 |
| KPCB  | AGC      | 89   | 1 | 0    | 1,1  |
| KPCD2 | CAMK     | 449  | 4 | +    | 1,4  |
| KPCD3 | CAMK     | 104  | 1 | 0    | -1,5 |
| KPCL  | AGC      | 208  | 1 | 0    | -1,3 |
| KPCT  | AGC      | 287  | 2 | 0    | -1,3 |
| KPYM  | NPK      | 677  | 2 | +    | 1,8  |
| KS6A1 | AGC      | 1449 | 2 | 0    | -1,2 |
| KS6A3 | AGC      | 3676 | 1 | 0    | -1,3 |
| KS6A4 | AGC      | 243  | 1 | 0    | 1,1  |
| KS6C1 | AGC      | 25   | 1 | 0    | 1,4  |

|       |          |      |   |    |      |
|-------|----------|------|---|----|------|
| KT3K  | NPK      | 903  | 1 | 0  | 1,1  |
| LCK   | TK       | 84   | 3 | +  | 1,3  |
| LIMK1 | TKL      | 979  | 1 | 0  | -1,2 |
| LIMK2 | TKL      | 84   | 1 | 0  | 1,5  |
| LYN   | TK       | 1639 | 1 | -  | -2,2 |
| M3K1  | STE      | 568  | 1 | 0  | 1,2  |
| M3K11 | TKL      | 730  | 1 | -  | -1,6 |
| M3K2  | STE      | 647  | 2 | 0  | 1,0  |
| M3K3  | STE      | 798  | 1 | 0  | -1,4 |
| M3K5  | STE      | 892  | 2 | +  | 1,7  |
| M4K1  | STE      | 1599 | 1 | 0  | 1,3  |
| M4K2  | STE      | 248  | 1 | 0  | 1,1  |
| M4K3  | STE      | 414  | 1 | 0  | 1,1  |
| M4K4  | STE      | 955  | 1 | 0  | 1,2  |
| MAPK5 | CAMK     | 117  | 1 | 0  | -1,2 |
| MARK2 | CAMK     | 1082 | 2 | 0  | -1,1 |
| MARK3 | CAMK     | 778  | 1 | 0  | 1,1  |
| MELK  | CAMK     | 79   | 1 | 0  | -1,5 |
| MK01  | CMGC     | 1282 | 4 | -  | -1,4 |
| MK03  | CMGC     | 865  | 2 | -  | -1,5 |
| MK07  | CMGC     | 41   | 1 | -  | -2,1 |
| MK08  | CMGC     | 205  | 3 | -  | 1,3  |
| MK09  | CMGC     | 296  | 4 | +  | 1,2  |
| MK13  | CMGC     | 30   | 1 | 0  | 1,5  |
| MK14  | CMGC     | 167  | 1 | 0  | 1,1  |
| MK15  | CMGC     | 210  | 1 | -  | -1,5 |
| MLTK  | TKL      | 1478 | 1 | 0  | -1,1 |
| MP2K1 | STE      | 207  | 2 | +  | 1,6  |
| MP2K2 | STE      | 62   | 1 | 0  | -1,4 |
| MP2K3 | STE      | 208  | 1 | 0  | 1,1  |
| MP2K6 | STE      | 288  | 1 | 0  | 1,1  |
| MRCKB | AGC      | 694  | 1 | +  | 2,4  |
| MUSK  | TK       | 30   | 1 | -  | -2,5 |
| MYLK  | CAMK     | 52   | 3 | 0  | -1,2 |
| NAGK  | NPK      | 39   | 1 | 0  | 1,3  |
| NEK1  | Other    | 254  | 1 | +  | 2,2  |
| NEK2  | Other    | 57   | 1 | -  | -4,7 |
| NEK5  | Other    | 48   | 1 | -  | -4,7 |
| NEK9  | Other    | 1262 | 4 | ++ | 1,6  |
| P4K2A | NPK      | 30   | 1 | +  | 5,7  |
| PAK4  | STE      | 764  | 2 | -  | -1,4 |
| PCTK1 | CMGC     | 441  | 2 | -  | -1,1 |
| PCTK2 | CMGC     | 591  | 2 | +  | 1,6  |
| PDXK  | NPK      | 888  | 4 | +  | 1,2  |
| PGK1  | NPK      | 183  | 1 | +  | 2,0  |
| PHKG2 | CAMK     | 109  | 1 | 0  | -1,3 |
| PI4KA | NPK      | 23   | 1 | 0  | 1,3  |
| PK3CD | NPK      | 1197 | 2 | 0  | -1,1 |
| PLK1  | Other    | 76   | 2 | -  | -1,2 |
| PRKDC | Atypical | 268  | 1 | 0  | 1,2  |
| PRPK  | Other    | 859  | 4 | 0  | 1,1  |

|       |          |      |   |      |      |
|-------|----------|------|---|------|------|
| QSK   | CAMK     | 34   | 1 | 0    | -1,5 |
| RIOK2 | Atypical | 384  | 1 | 0    | 1,3  |
| ROCK1 | AGC      | 234  | 2 | 0    | -1,2 |
| ROCK2 | AGC      | 1175 | 1 | 0    | 1,1  |
| ROR2  | TK       | 35   | 1 | 0    | 1,2  |
| SLK   | STE      | 522  | 2 | 0    | -1,1 |
| SN1L2 | CAMK     | 65   | 1 | 0    | -1,4 |
| SRC   | TK       | 330  | 2 | --   | -2,5 |
| ST17B | CAMK     | 43   | 1 | -    | -1,5 |
| STK10 | STE      | 490  | 2 | ++   | 1,7  |
| STK11 | CAMK     | 99   | 1 | 0    | 1,2  |
| STK16 | Other    | 252  | 2 | 0    | -1,1 |
| STK24 | STE      | 85   | 1 | 0    | -1,0 |
| STK3  | STE      | 171  | 1 | 0    | 1,3  |
| STK36 | Other    | 83   | 1 | 0    | -1,2 |
| STK4  | STE      | 519  | 4 | ++++ | 2,3  |
| STK6  | Other    | 187  | 2 | -    | -1,9 |
| TAOK1 | STE      | 571  | 1 | 0    | 1,2  |
| TAOK2 | STE      | 641  | 1 | 0    | 1,3  |
| TAOK3 | STE      | 314  | 1 | 0    | -1,3 |
| TBK1  | Other    | 947  | 4 | 0    | 1,1  |
| TEC   | TK       | 159  | 1 | -    | -3,3 |
| TGFR1 | TKL      | 245  | 1 | 0    | 1,2  |
| TGFR2 | TKL      | 329  | 1 | -    | -1,9 |
| TITIN | CAMK     | 113  | 1 | 0    | 1,4  |
| TLK1  | Other    | 34   | 1 | 0    | 1,4  |
| TLK2  | Other    | 262  | 1 | 0    | 1,0  |
| TNIK  | STE      | 247  | 1 | 0    | 1,3  |
| TOPK  | Other    | 86   | 1 | 0    | -1,1 |
| TSSK2 | CAMK     | 31   | 1 | 0    | -1,2 |
| TXK   | TK       | 96   | 1 | 0    | 1,1  |
| TYK2  | TK       | 410  | 1 | 0    | -1,1 |
| ULK3  | Other    | 117  | 2 | 0    | -1,0 |
| VRK2  | CK1      | 137  | 1 | +    | 2,0  |
| YES   | TK       | 331  | 1 | 0    | -1,2 |
| YSK4  | STE      | 29   | 1 | 0    | 1,1  |

---
